# Supplementary material
Source: Springer Nature journal article supplement (https://www.springermedizin.de/resource/supplementary/12936_2005_177_MOESM1_ESM.pdf/9547070)
Supplement: MOESM1 [file 9547070]

1. Will you be willing to pay 1000 Dinars for a family-size insecticide treated net for your use bearing in mind your average monthly household income and money you spend on various items? [     ] 1 = Yes (2) 0 = No (3)

2. What if the price is 1200 Dinars will you be willing to pay? [     ] 1 = Yes 0 = No  
(Interviewer: No matter the answer, go to 4)

3. What if the price is 800 Dinars will you be willing to pay? [     ] 1 = Yes 0 = No  
(Interviewer: No matter the answer, go to 4)

4. What is the maximum amount you are willing to pay for a family-size insecticide-treated net bearing in mind your average monthly household income and money you spend on various items? [                     ] Dinars
